# Supplementary material for: Cholinergic modulation shifts the response of CA1 pyramidal cells to depolarizing ramps via TRPM4 channels with potential implications for place field firing
Source: eLife. 2023 Jul 5;12:e84387. doi: 10.7554/eLife.84387 (PMC10365838; doi:10.7554/eLife.84387)
Supplement: Figure 1—figure supplement 2—source data 1. [file elife-84387-fig1-figsupp2-data1.xlsx]

## Sheet: Fig1suppl2
Panel A	somatic recordings					dendritic recordings					Panel B	somatic recordings					dendritic recordings					Panel C	somatic recordings					dendritic recordings
	control		CCh			control		CCh				control		CCh			control		CCh				control		CCh			control		CCh
	adaptation index	Vm (mV)	adaptation index	Vm (mV)		adaptation index	Vm (mV)	adaptation index	Vm (mV)			adaptation index	peak amplitude (pA)	adaptation index	peak amplitude (pA)		adaptation index	peak amplitude (pA)	adaptation index	peak amplitude (pA)			adaptation index	input resistance (MΩ)	adaptation index	input resistance (MΩ)		adaptation index	input resistance (MΩ)	adaptation index	input resistance (MΩ)
	0.2	-62.3072	-0.333333	-65.9182		0.5	-53.1683	-0.0555556	-65.8804			0.2	150	-0.333333	150		0.5	210	-0.0555556	200			0.312296	48.6667	-0.223613	56.3333		0.766234	30.6667	0.0900966	32.6667
	0.25	-62.4021	-0.375	-65.9398		0.52381	-55.992	-0.142857	-68.6039			0.25	170	-0.375	200		0.52381	260	-0.142857	150			0.321203	42.3333	-0.240392	48		0.315476	35.6667	-0.422222	38.3333
	0.5	-62.5726	-0.217391	-66.3342		0.714286	-60.2609	0	-60.0013			0.5	180	-0.217391	230		0.714286	150	0	150			0.269735	41.6667	-0.463021	48.6667		0.236364	69.3333	-0.833333	65
	0.2	-63.1231	-0.222222	-61.2622		0.818182	-60.7522	0.0434783	-60.4692			0.2	200	-0.222222	100		0.818182	250	0.0434783	150			0.152807	69.6667	-0.159667	73		0.445675	60	-0.488369	61.6667
	0.428571	-62.1095	-0.230769	-61.5866		0	-60.1755	0.1	-62.1594			0.428571	220	-0.230769	70		0	250	0.1	150			0.351429	40.6667	-0.0882045	46		0.39377	54.6667	-0.5375	55.3333
	0.368421	-61.7899	0.037037	-61.0947		0.333333	-60.0899	0.130435	-61.7061			0.368421	250	0.037037	140		0.333333	300	0.130435	200			0.274243	65.3333	-0.108557	71.3333		0.886772	45.6667	-0.643182	48.3333
	0.333333	-66.2123	-0.2	-66.0674		0.5	-60.1263	0.1	-62.2448			0.333333	250	-0.2	200		0.5	280	0.1	200			0.365342	44	-0.0532045	50		0.445359	48.3333	-0.191776	57.3333
	0.333333	-66.4476	-0.172414	-65.8976		0.428571	-60.1911	-1	-66.5648			0.333333	250	-0.172414	250		0.428571	320	-1	120			0.471154	52.6667	-0.264901	58.3333		0.606511	56.3333	-0.716017	66.3333
	0.272727	-65.974	-0.454545	-65.8306		0.2	-57.9905	0	-65.4525			0.272727	270	-0.454545	150		0.2	50	0	170			0.265212	49.6667	-0.164505	62		0.740359	34	-0.371034	48.6667
	0.285714	-66.4413	-0.25	-63.112		0.272727	-58.8461	-1	-65.5784			0.285714	300	-0.25	50		0.272727	100	-1	70			0.27735	56.6667	-0.155041	67		0.250162	24	-0.375504	22.3333
	0.263158	-66.7049	-0.125	-61.2314		0.2	-59.2706	-0.285714	-66.3523			0.263158	350	-0.125	60		0.2	100	-0.285714	150			0.282164	46.3333	-0.224177	57.3333		0.374964	49	-0.311485	50
	0.333333	-62.4962	-0.714286	-66.8811		0.272727	-58.7294	-0.047619	-65.2978			0.333333	200	-0.714286	120		0.272727	100	-0.047619	180			0.381053	53	-0.333333	64.3333		0.626058	33.3333	-0.221569	35.6667
	0.428571	-62.1943	-0.52381	-66.7826		0.333333	-56.5045	-0.2	-69.2486			0.428571	250	-0.52381	150		0.333333	130	-0.2	180			0.231277	50	-0.477362	57.3333
	0.333333	-61.3522	-0.266667	-66.2641		0.333333	-55.5374	-1	-63.9056			0.333333	220	-0.266667	200		0.333333	110	-1	50			0.43479	44.6667	-0.168054	48
	0.368421	-60.9695	-0.310345	-63.8987		0.555556	-55.7521	-1	-66.5296			0.368421	250	-0.310345	100		0.555556	130	-1	100			0.257714	68.3333	-0.0984127	76
	0.28	-65.7761	-0.5	-63.2751		0.636364	-55.3547	-0.666667	-66.9019			0.28	400	-0.5	50		0.636364	160	-0.666667	130			0.299468	55.3333	-0.527407	55.3333
	0.266667	-66.0658	-0.238095	-69.931		0.625	-53.0397	-0.5	-67.2082			0.266667	450	-0.238095	250		0.625	150	-0.5	150			0.237913	34.6667	-0.59711	43.3333
	0.238095	-65.8938	-0.125	-69.4327		0.5	-54.046	-1	-67.3572			0.238095	350	-0.125	300		0.5	100	-1	130
	0.241379	-63.7546	-0.263158	-68.9494		0.538462	-54.0994	-0.44	-59.7679			0.241379	300	-0.263158	200		0.538462	120	-0.44	60
	0.307692	-63.4903	-0.142857	-69.5509		0.454545	-53.5263	-0.555556	-62.0765			0.307692	250	-0.142857	150		0.454545	100	-0.555556	70
	0.257143	-63.5596	-0.133333	-67.1321		0.454545	-54.2228	-0.333333	-61.7336			0.257143	350	-0.133333	250		0.454545	100	-0.333333	80
	0.272727	-66.4442	-0.0555556	-67.1466		0.142857	-57.1344	-0.636364	-65.1641			0.272727	300	-0.0555556	300		0.142857	110	-0.636364	100
	0.2	-69.8687	-0.153846	-65.2993		0.538462	-56.2602	-0.833333	-65.2662			0.2	400	-0.153846	250		0.538462	160	-0.833333	110
	0.12	-69.7703	-0.142857	-65.2759		0.538462	-56.5902	-0.5	-64.878			0.12	450	-0.142857	250		0.538462	160	-0.5	120
	0.133333	-68.7519	-0.0588235	-65.0879		0.142857	-64.9446	-0.12	-62.8868			0.133333	450	-0.0588235	300		0.142857	250	-0.12	120
	0.157895	-68.6389	0	-64.8891		0.4	-60.4319	-1	-70.3156			0.157895	550	0	350		0.4	80	-1	50
	0.333333	-64.7399	0.047619	-65.2104		0.538462	-60.3718	-0.4	-72.4121			0.333333	250	0.047619	400		0.538462	110	-0.4	150
	0.357143	-64.4672	-0.0714286	-65.5185		0.4	-60.1049	-0.5	-71.1115			0.357143	450	-0.0714286	250		0.4	80	-0.5	140
	0.4	-64.7555	-0.238095	-65.4562		0.5	-59.5181	-0.25	-69.9338			0.4	350	-0.238095	200		0.5	90	-0.25	130
	0.333333	-64.9024	-0.103448	-65.7414		0.142857	-63.7241	-1	-70.4741			0.333333	550	-0.103448	100		0.142857	80	-1	230
	0.333333	-64.8088	0	-66.2621		0.428571	-61.6158	-1	-70.4108			0.333333	600	0	200		0.428571	90	-1	240
	0.285714	-64.3666	-0.222222	-65.0204		0.428571	-61.4878	-1	-70.0047			0.285714	300	-0.222222	50		0.428571	100	-1	220
	0.3	-64.2035	-0.027027	-65.7516		0.384615	-61.9949	-1	-62.6878			0.3	200	-0.027027	350		0.384615	110	-1	220
	0.277778	-64.2966	0.025641	-65.8911		0.333333	-62.5012	-1	-60.5728			0.277778	400	0.025641	400		0.333333	80	-1	150
	0.268293	-63.9585	-0.0625	-65.7198		0.454545	-61.7046	-1	-61.3253			0.268293	500	-0.0625	300		0.454545	90	-1	160
	0.244444	-64.4308	0.0731707	-66.0086		0.285714	-60.9151	-0.909091	-61.3429			0.244444	600	0.0731707	450		0.285714	100	-0.909091	40
	0.269231	-64.8602	-0.0967742	-65.415		0.428571	-60.6992	-1	-64.9202			0.269231	700	-0.0967742	250		0.428571	90	-1	100
	0.368421	-66.3112	-0.0625	-62.9959		0.714286	-54.5062	-0.363636	-62.6323			0.368421	450	-0.0625	200		0.714286	250	-0.363636	120
	0.333333	-66.6546	-0.0909091	-63.1297		0.714286	-58.1569	-0.3	-63.1932			0.333333	500	-0.0909091	200		0.714286	280	-0.3	110
	0.375	-66.657	-0.027027	-62.5985		0.714286	-56.9902	-0.16129	-60.5563			0.375	400	-0.027027	250		0.714286	280	-0.16129	70
	0.384615	-66.4815	-0.153846	-62.735		0.333333	-59.524	-0.375	-63.3011			0.384615	350	-0.153846	150		0.333333	230	-0.375	50
	0.36	-63.7697	-0.12	-62.689		0.428571	-59.6396	-0.538462	-64.9869			0.36	400	-0.12	150		0.428571	290	-0.538462	70
	0.304348	-63.4503	-0.0434783	-63.009		0.428571	-58.9168	-0.047619	-63.7891			0.304348	350	-0.0434783	150		0.428571	270	-0.047619	90
	0.368421	-62.3391	-0.428571	-64.0131		0.333333	-58.9812	-0.454545	-67.6735			0.368421	300	-0.428571	150		0.333333	240	-0.454545	100
	0.333333	-63.7176	-0.235294	-63.7729		0.142857	-59.0513	0.0344828	-62.7949			0.333333	250	-0.235294	250		0.142857	230	0.0344828	120
	0.333333	-63.6807	-0.225806	-60.205		0	-58.8977	0.2	-63.9982			0.333333	200	-0.225806	150		0	220	0.2	120
	0.266667	-63.7379	-0.294118	-64.5553		0.5	-50.1936	-0.571429	-66.2121			0.266667	450	-0.294118	100		0.5	80	-0.571429	60
	0.384615	-64.3271	-0.333333	-64.6291		0.555556	-60.2593	-0.333333	-63.549			0.384615	250	-0.333333	50		0.555556	270	-0.333333	50
	0.555556	-64.3072	-0.4	-64.4887		0.428571	-60.4282	-0.818182	-67.5942			0.555556	200	-0.4	70		0.428571	250	-0.818182	50
	0.444444	-64.2877	-0.384615	-62.4631		0	-56.4453	-0.857143	-68.0839			0.444444	300	-0.384615	50		0	170	-0.857143	60
	0.5	-64.2993	-0.142857	-65.815		0.454545	-54.8356	-1	-68.0929			0.5	180	-0.142857	150		0.454545	200	-1	50
	0.333333	-65.6824	-0.0344828	-65.6921		0.5	-47.7503	-0.0769231	-67.956			0.333333	500	-0.0344828	200		0.5	130	-0.0769231	150
	0.333333	-65.4302	-0.466667	-66.163		0.6	-56.321	-0.0526316	-65.2333			0.333333	150	-0.466667	150		0.6	110	-0.0526316	120
	0.285714	-65.5121	-0.333333	-66.1903		1	-55.2295	-0.0769231	-67.8169			0.285714	250	-0.333333	170		1	110	-0.0769231	150
	0.166667	-65.1413	-0.222222	-66.4043		0.714286	-55.1118	-0.0666667	-68.3474			0.166667	200	-0.222222	200		0.714286	130	-0.0666667	180
	0.25	-65.3627	-0.222222	-67.7272		1	-54.8151	-0.833333	-64.7437			0.25	300	-0.222222	150		1	120	-0.833333	50
	0.222222	-65.9017	-0.166667	-66.3652		1	-56.4392	-0.529412	-63.8886			0.222222	220	-0.166667	250		1	120	-0.529412	50
	0.25	-65.6851	-0.0740741	-66.5354		1	-55.9231	0.0833333	-61.3518			0.25	200	-0.0740741	300		1	110	0.0833333	70
	0.384615	-65.9624	-0.0769231	-63.291		0.666667	-55.9374	0.0909091	-63.5971			0.384615	250	-0.0769231	150		0.666667	100	0.0909091	90
	0.333333	-65.6674	-0.0588235	-64.5285		1	-56.3923	-0.666667	-64.7818			0.333333	270	-0.0588235	200		1	110	-0.666667	90
	0.111111	-65.302	-0.0416667	-61.9608		1	-56.259	-0.692308	-63.5294			0.111111	150	-0.0416667	150		1	110	-0.692308	100
	0.307692	-65.3893	0.0175439	-62.9643		0.454545	-57.6052	-0.52381	-64.3202			0.307692	300	0.0175439	200		0.454545	120	-0.52381	120
	0.25	-63.5473	-0.235294	-64.9035		0.428571	-58.133	-0.2	-58.041			0.25	300	-0.235294	150		0.428571	150	-0.2	350
	0.333333	-63.4326	-0.25	-65.736		0.454545	-54.4293	-0.181818	-53.0981			0.333333	280	-0.25	100		0.454545	170	-0.181818	200
	0.263158	-63.1886	-0.1875	-66.8722		0.444444	-57.3283	-0.263158	-53.3112			0.263158	320	-0.1875	100		0.444444	160	-0.263158	150
	0.473684	-62.1217	0.0526316	-63.3486		0.428571	-55.9629	-0.333333	-53.2562			0.473684	300	0.0526316	100		0.428571	170	-0.333333	100
	0.368421	-62.3545	-0.272727	-63.762		0.478261	-54.5411	-0.666667	-58.3582			0.368421	280	-0.272727	100		0.478261	180	-0.666667	300
	0.466667	-62.6413	-0.25	-63.4484		0.428571	-58.185	-0.428571	-58.2919			0.466667	250	-0.25	110		0.428571	180	-0.428571	400
	0.263158	-62.1224	-0.111111	-65.9479		0.692308	-61.6564	-0.636364	-58.5681			0.263158	200	-0.111111	110		0.692308	150	-0.636364	400
	0.333333	-62.4672	-0.2	-65.7054		0.6	-58.6737	-0.294118	-53.7958			0.333333	180	-0.2	120		0.6	130	-0.294118	250
	0.166667	-66.455	-0.25	-65.1968		0.571429	-58.1411	-1	-64.7584			0.166667	200	-0.25	140		0.571429	110	-1	200
	0.2	-66.138	-0.222222	-62.2025		0.636364	-65.3342	-0.0434783	-61.9625			0.2	220	-0.222222	100		0.636364	180	-0.0434783	150
	0.285714	-66.3416	-0.285714	-62.6912		0.6	-60.1394	-0.238095	-61.3986			0.285714	210	-0.285714	80		0.6	120	-0.238095	100
	0.272727	-66.3617	-0.25	-63.0853		0.555556	-63.1682	-0.25	-63.6367			0.272727	190	-0.25	60		0.555556	110	-0.25	80
	0.384615	-66.312	-0.2	-62.2564		0.571429	-60.456	-1	-66.331			0.384615	270	-0.2	50		0.571429	120	-1	80
	0.454545	-66.5841	-0.2	-62.2667		0.625	-60.3585	-0.454545	-65.3795			0.454545	250	-0.2	40		0.625	140	-0.454545	160
	0.4	-66.3279	-0.333333	-63.7276		0.333333	-57.2215	-0.176471	-64.1222			0.4	230	-0.333333	150		0.333333	130	-0.176471	150
	0.5	-66.4962	-0.333333	-64.8389		0.5	-59.2678	-0.714286	-63.3229			0.5	220	-0.333333	120		0.5	150	-0.714286	180
	0.666667	-63.9908	-0.333333	-63.9348		0.333333	-60.8234	-0.333333	-62.8581			0.666667	100	-0.333333	130		0.333333	170	-0.333333	180
	0.454545	-63.9469	-0.333333	-65.9922		0.384615	-60.3768	-0.333333	-62.9511			0.454545	150	-0.333333	60		0.384615	200	-0.333333	180
	0.411765	-64.064	-0.428571	-66.9199		0.529412	-60.1028	-0.176471	-62.7743			0.411765	200	-0.428571	56		0.529412	210	-0.176471	200
	0.428571	-67.4181	-0.368421	-66.1333		0.142857	-69.4626	0	-58.4605			0.428571	250	-0.368421	52		0.142857	370	0	180
	0.473684	-62.1757	-0.384615	-67.0361		0.384615	-63.4722	0.111111	-55.2585			0.473684	180	-0.384615	48		0.384615	300	0.111111	250
	0.111111	-60.0485	-0.538462	-67.329		0.375	-59.2889	-0.111111	-57.2735			0.111111	60	-0.538462	44		0.375	250	-0.111111	300
	0.25	-60.4082	-0.428571	-67.2727		0.454545	-58.3933	-0.166667	-58.4336			0.25	110	-0.428571	40		0.454545	150	-0.166667	300
	0.166667	-63.8681	-0.6	-66.545		0.666667	-54.8676	-0.647059	-62.0329			0.166667	150	-0.6	32		0.666667	90	-0.647059	250
	0.272727	-63.5042	-0.5	-66.8016		0.75	-53.9383	-0.294118	-61.3029			0.272727	140	-0.5	28		0.75	90	-0.294118	150
	0.230769	-62.7084	-0.714286	-66.5819		0.714286	-54.2134					0.230769	130	-0.714286	22		0.714286	90
	0.2	-61.5077	-0.217391	-67.1047		0.8	-52.8753					0.2	120	-0.217391	250		0.8	120
	0.294118	-60.6744	-0.294118	-66.6656		0.818182	-55.5042					0.294118	110	-0.294118	200		0.818182	110
	0.333333	-59.4068	-0.375	-66.0296		0.8	-55.0808					0.333333	100	-0.375	180		0.8	90
	0.3	-58.1258	0.0666667	-66.8121		0.555556	-54.3514					0.3	90	0.0666667	150		0.555556	70
	0.222222	-61.9024	-0.384615	-66.143		0.818182	-56.0589					0.222222	90	-0.384615	160		0.818182	120
	0.238095	-60.5642	-0.555556	-66.8802		0.333333	-59.0399					0.238095	80	-0.555556	160		0.333333	150
	0.333333	-60.5391	-0.25	-62.586		0.25	-62.4159					0.333333	70	-0.25	80		0.25	200
	0.333333	-60.6389	-0.0434783	-60.5502		0.466667	-58.2759					0.333333	130	-0.0434783	90		0.466667	160
	0.3	-60.2521	-0.0434783	-61.0482		0.538462	-56.6693					0.3	60	-0.0434783	100		0.538462	120
	0.28	-61.7472	-0.047619	-62.2349		0.454545	-56.511					0.28	80	-0.047619	120		0.454545	100
	0.333333	-58.9941	0.037037	-61.0109		0.384615	-54.7466					0.333333	150	0.037037	150		0.384615	90
	0.333333	-59.2619	0.0909091	-61.2601		0.538462	-56.333					0.333333	140	0.0909091	200		0.538462	130
	0.428571	-59.3029	-0.5	-65.1648		0.5	-56.8641					0.428571	160	-0.5	20		0.5	130
	0.25	-61.6656	-0.157895	-66.9903		0.384615	-56.8641					0.25	150	-0.157895	90		0.384615	200
	0.111111	-61.4629	0.0588235	-69.2973		0.285714	-48.4402					0.111111	150	0.0588235	130		0.285714	200
	0.333333	-59.2293	0	-67.9246		0.4	-48.4755					0.333333	140	0	180		0.4	150
	0.272727	-59.8381	0.0625	-64.836		0.2	-51.0603					0.272727	130	0.0625	120		0.2	170
	0.333333	-60.1633	0	-66.6142		0.142857	-50.7829					0.333333	120	0	80		0.142857	200
	0.454545	-60.052	-0.222222	-66.432		0.272727	-48.9807					0.454545	100	-0.222222	80		0.272727	200
	0.428571	-59.966	-0.0714286	-65.9222		0.333333	-47.8948					0.428571	130	-0.0714286	100		0.333333	170
	0.5	-59.7822	-0.1	-66.6128		0.166667	-47.0464					0.5	150	-0.1	90		0.166667	200
	0.384615	-63.4715	-0.6	-60.9818		0.2	-45.8029					0.384615	200	-0.6	70		0.2	130
	0.25	-64.1684	-0.5	-61.8635		0.333333	-59.3515					0.25	150	-0.5	80		0.333333	230
	0.2	-59.9107	-0.259259	-57.9045		0.428571	-57.7303					0.2	120	-0.259259	80		0.428571	210
	0.333333	-60.5368	-0.52	-62.0681		0.428571	-59.1364					0.333333	170	-0.52	150		0.428571	240
	0.272727	-64.806	-0.44	-61.3385		0.714286	-58.8222					0.272727	250	-0.44	140		0.714286	250
	0.263158	-60.3992	-0.4	-61.1198		0.75	-58.3799					0.263158	180	-0.4	120		0.75	260
	0.25	-60.806	-0.5	-62.6233		0.5	-61.2266					0.25	150	-0.5	100		0.5	150
	0.142857	-64.9653	-1	-61.9626		0.333333	-61.0805					0.142857	250	-1	90		0.333333	170
	0.0909091	-64.8453	-0.185185	-62.1706		0.555556	-60.4756					0.0909091	220	-0.185185	110		0.555556	160
	0.294118	-60.3766	-0.333333	-64.529		0.5	-60.9523					0.294118	150	-0.333333	100		0.5	180
	0.294118	-59.6042	-0.222222	-64.8418		0.538462	-59.0184					0.294118	130	-0.222222	120		0.538462	160
	0.333333	-62.431	-0.222222	-65.7874		0.4	-62.0012					0.333333	120	-0.222222	140		0.4	190
	0.428571	-67.462	-0.6	-65.8798		0.272727	-63.9906					0.428571	250	-0.6	100		0.272727	250
	0.333333	-62.397	-0.391304	-62.8229		0.5	-60.8635					0.333333	170	-0.391304	80		0.5	170
	0.555556	-62.397	-0.5	-65.0078		0.428571	-55.4309					0.555556	140	-0.5	100		0.428571	180
	0.466667	-61.672	-0.230769	-66.0756		0.2	-58.6382					0.466667	200	-0.230769	130		0.2	220
	0.5	-63.759	-0.333333	-65.0984		0.5	-54.9463					0.5	200	-0.333333	110		0.5	180
	0.538462	-61.094	-0.444444	-64.9597		0.333333	-58.8069					0.538462	140	-0.444444	80		0.333333	250
	0.444444	-60.769	-0.473684	-63.6194		0.454545	-56.427					0.444444	190	-0.473684	70		0.454545	190
	0.466667	-60.272	-1	-66.0579		0.333333	-58.1473					0.466667	140	-1	60		0.333333	250
	0.538462	-61.185	-0.222222	-66.392		0.5	-57.387					0.538462	130	-0.222222	130		0.5	300
	0.538462	-60.847	-0.75	-65.9823		0.428571	-57.0846					0.538462	130	-0.75	80		0.428571	290
	0.272727	-65.159	-0.692308	-66.0177		0.5	-56.8302					0.272727	180	-0.692308	80		0.5	310
			0	-67.79		0.75	-56.3684							0	140		0.75	320
			-0.125	-66.244		0.8	-54.3298							-0.125	140		0.8	320
			0.047619	-65.556		0.777778	-53.5591							0.047619	160		0.777778	290
			-0.2	-64.772										-0.2	90
			-0.047619	-64.334										-0.047619	120
			0.0909091	-65.809										0.0909091	160
			-0.166667	-66.328										-0.166667	100
			-0.230769	-66.947										-0.230769	120
			-0.230769	-67.247										-0.230769	130
			-0.142857	-66.862										-0.142857	120
			0	-65.822										0	140
			-0.4	-66.69										-0.4	110
