# Supplementary material for: Cholinergic modulation shifts the response of CA1 pyramidal cells to depolarizing ramps via TRPM4 channels with potential implications for place field firing
Source: eLife. 2023 Jul 5;12:e84387. doi: 10.7554/eLife.84387 (PMC10365838; doi:10.7554/eLife.84387)
Supplement: Figure 1—source data 1. [file elife-84387-fig1-data1.xlsx]

## Sheet: Fig1
	Panel D	2 s ramp				10 s ramp			Panel H	2 s ramp				10 s ramp
		control	CCh			control	CCh			control	CCh			control	CCh
		0.312296	-0.223613			0.323284	-0.311027			0.511905	-0.0992063			0.458042	0.15202
		0.321203	-0.240392			0.281057	-0.530437			0.766234	0.0900966			0.479871	-0.134434
		0.269735	-0.463021			0.193078	-0.703684			0.315476	-0.422222			0.345719	-0.14407
		0.152807	-0.159667			0.0532571	-0.520996			0.236364	-0.833333			0.33205	-0.379009
		0.351429	-0.0882045			0.287575	-0.0498425			0.445675	-0.488369			0.35697	0.019647
		0.274243	-0.108557			0.160281	-0.100566			0.39377	-0.5375			0.373984	-0.3
		0.365342	-0.0532045			0.253223	-0.0348837			0.619048	-1			0.330156	-0.41789
		0.327684	-0.296557			0.0551801	-0.225158			0.34291	-1			0.333333	-0.0326087
		0.471154	-0.264901			0.250387	-0.500747			0.886772	-0.643182			0.441558	-0.0541145
		0.265212	-0.164505			0.144461	-0.059955			0.445359	-0.191776			0.258621	-0.307692
		0.27735	-0.155041			0.180695	-0.462			0.606511	-0.716017
		0.282164	-0.224177			0.245533	-0.26445			0.381968	-0.0682861
		0.381053	-0.333333			0.244695	-0.667188			0.740359	-0.371034
		0.231277	-0.477362			0.190944	-0.900678			0.427855	-0.500611
		0.43479	-0.168054			0.247978	-0.156153			0.250162	-0.375504
		0.487046	-0.107314			0.324511	-0.0890453			0.530952	-0.506315
		0.257714	-0.0984127			0.38652	-0.213483			0.45001	-0.315508
		0.299468	-0.527407			0.366568	-0.313131			0.374964	-0.311485
		0.403546	-0.335374			0.367463	-0.0816327			0.626058	-0.221569
		0.237913	-0.59711
		0.45139	-0.117096
	average	0.32642	-0.247776		average	0.239826	-0.325529		average	0.492229	-0.447991		average	0.37103	-0.159815
	SEM	0.0190197	0.0341427		SEM	0.0219514	0.058552		SEM	0.0406348	0.0684827		SEM	0.0217269	0.059054
