# Supplementary material for: Cholinergic modulation shifts the response of CA1 pyramidal cells to depolarizing ramps via TRPM4 channels with potential implications for place field firing
Source: eLife. 2023 Jul 5;12:e84387. doi: 10.7554/eLife.84387 (PMC10365838; doi:10.7554/eLife.84387)
Supplement: Figure 2—source data 1. [file elife-84387-fig2-data1.xlsx]

## Sheet: Fig2
	Panel C					Panel D
		control	CCh				control	CCh
		0.26296	-0.375977				13.659	8.7742
		0.0428681	-0.14719				11.278	9.6317
		0.136364	-0.304267				7.6132	4.8015
		0.027972	-0.195178				9.612	7.1056
		0.17799	-0.105101				9.0296	6.33
		0.176095	-0.0419175				7.6762	7.8257
		0.348062	-0.00689655				5.8466	4.6862
		0.252918	-0.0847218				6.1356	5.5883
		0.175005	0				4.66	4.903
		0.0627972	-0.274567				10.87	6.88
		0.350639	-0.327652				10.79	8.39
	average	0.183061	-0.169406			average	8.83365	6.81056
	SEM	0.04	0.03			SEM	0.82201	0.5165
