# Supplementary material for: Cholinergic modulation shifts the response of CA1 pyramidal cells to depolarizing ramps via TRPM4 channels with potential implications for place field firing
Source: eLife. 2023 Jul 5;12:e84387. doi: 10.7554/eLife.84387 (PMC10365838; doi:10.7554/eLife.84387)
Supplement: Figure 3—source data 1. [file elife-84387-fig3-data1.xlsx]

## Sheet: Fig3
	Panel E
		control	2 µM ACh	10 µM ACh	15 µM ACh
		0.412264	0.194563	0.0416667	0.146777
		0.67381	0.404537	0.227015	0.166518
		0.227211	0.191536	0.190564	0.266667
		0.456864	0.257193	0.192035	0.0956585
		0.247464	-0.0248447	-0.242171	-0.243636
		0.337576	0.197802	0.0175439	-0.113651
		0.470105	0.107578	0.176133	0.188833
		0.309488	-0.00522558	-0.181133	-0.137096
		0.164904	-0.167247	-0.397617	-0.522191
		0.353427	0.258706	0.1224	0.0653595
		0.319878	0.162099	-0.149741	-0.163174
		0.321251	0.10246	-0.0150624	0.0642735
		0.204663	0.157086	0.0110151	-0.0692419
	average	0.34607	0.14125	-0.000565521	-0.0196079
	SEM	0.04	0.04	0.06	0.06
