# Supplementary material for: Cholinergic modulation shifts the response of CA1 pyramidal cells to depolarizing ramps via TRPM4 channels with potential implications for place field firing
Source: eLife. 2023 Jul 5;12:e84387. doi: 10.7554/eLife.84387 (PMC10365838; doi:10.7554/eLife.84387)
Supplement: Figure 4—source data 1. [file elife-84387-fig4-data1.xlsx]

## Sheet: Fig3
Panel A4	somatic injection				Panel B4	dendritic injection				Panel C4	somatic injection				Panel D4	dendritic injection
	control	CCh	CCh+FFA			control	CCh	CCh+FFA			control	CCh	CCh+SKF			control	CCh	CCh+SKF
	0.144587	-0.583401	0.0530487			0.515048	-0.928571	-0.15666			0.153016	-0.733333	-0.283117			0.5595	-0.275824	-0.3125
	0.358017	-0.318992	0.216531			0.533117	-0.290111	0.304286			0.321316	-0.277737	0.0473214			0.0518679	-0.494998	-0.38982
	0.129604	-0.715381	0.043956			0.513117	-0.326478	0.482653			0.533803	-0.54873	-0.446524			0.578157	-0.276623	-0.158377
	0.290655	-0.174839	0.397856			0.577201	0.0516106	0.492857			0.327898	-0.323266	-0.693447			0.654329	-0.0777223	-0.120665
	0.406034	-0.0333333	0.54881			0.504071	-0.834286	0.284266			0.534894	-0.0557296	-0.0151597			0.450682	-0.26748	-0.37619
	0.642262	-0.566964	0.105161			0.539048	-1	0.21232			0.662715	-0.444853	-0.423606			1	0.0719971	0.06276
	0.353782	-0.123203	0.263455			0.487173	-0.422487	0.126667			0.258242	-0.49899	-0.195195			0.0436508	-0.461175	-0.455988
	0.353409	-0.634668	0.160257			0.609977	-0.473411	-0.149361			0.638258	0.00115942	0.0708899			0.404297	-0.160886	-0.105486
	0.490816	-0.107105	0.429437			0.376623	-0.60474	0.237662
average	0.35213	-0.361987	0.246501		average	0.517264	-0.536497	0.203854		average	0.428768	-0.360185	-0.242355		average	0.46781	-0.242839	-0.232034
SEM	0.05	0.09	0.06		SEM	0.02	0.11	0.08		SEM	0.07	0.09	0.1		SEM	0.11	0.07	0.06
