# Supplementary material for: Cholinergic modulation shifts the response of CA1 pyramidal cells to depolarizing ramps via TRPM4 channels with potential implications for place field firing
Source: eLife. 2023 Jul 5;12:e84387. doi: 10.7554/eLife.84387 (PMC10365838; doi:10.7554/eLife.84387)
Supplement: Figure 5—source data 1. [file elife-84387-fig5-data1.xlsx]

## Sheet: Fig4
Panel A4	somatic injection				Panel B4	dendritic injection				Panel C4	somatic injection
	control	CCh	CCh+CBA			control	CCh	CCh+CBA			control	CCh	CCh+9Phen
	0.44375	-0.0123724	0.334235			0.40979	-0.352754	0.312121			0.371282	-0.320031	0.109158
	0.376312	-0.48418	-0.185122			0.104201	-0.0721942	0.16624			0.276428	-0.217272	0.204633
	0.366193	0.0489277	0.344857			0.338114	-0.0816345	0.181411			0.469322	-0.023083	0.17404
	0.0661719	-0.835973	-0.0247706			0.355533	-0.706767	0.0701516			0.356767	0.047955	0.370148
	0.101275	-0.675799	-0.0193821			0.695315	-0.0834541	0.0380003			0.426381	-0.226852	-0.123385
	0.325689	-0.298637	0.294296			0.248677	-0.541331	-0.230556			0.486427	0.0139334	0.303728
	0.400421	-0.370261	0.257283			0.395151	-0.863158	0.0809524			0.485381	-0.0658699	0.333168
	0.330556	-0.239212	0.259104			0.64881	-0.477778	0.0415851			0.295238	-0.354741	0.136542
	0.235498	-0.50119	0.233434			0.284361	-0.47619	0.0697358
average	0.293985	-0.3743	0.165993		average	0.386661	-0.40614	0.0810714		average	0.395903	-0.143245	0.188504
SEM	0.05	0.1	0.07		SEM	0.07	0.1	0.05		SEM	0.03	0.06	0.06
