# Supplementary material for: Cholinergic modulation shifts the response of CA1 pyramidal cells to depolarizing ramps via TRPM4 channels with potential implications for place field firing
Source: eLife. 2023 Jul 5;12:e84387. doi: 10.7554/eLife.84387 (PMC10365838; doi:10.7554/eLife.84387)
Supplement: Figure 6—source data 1. [file elife-84387-fig6-data1.xlsx]

## Sheet: Fig6
	Panel A3	Xestospongin C			Panel B3	ryanodine
		control	CCh			control	CCh
		0.338843	-0.364912			0.237067	-0.746531
		0.332372	-0.119348			-0.0533533	-0.634632
		0.425404	-0.414336			0.254905	-0.576096
		0.355556	-0.108321			0.263511	-0.509803
		0.330612	-0.546883			0.245947	-0.335108
		0.224242	-0.757543			0.563059	-0.3125
		0.234416	-0.556433			0.378869	-0.595431
		0.29988	-0.307788			0.371012	-0.120134
		0.28254	-0.210422			0.302597	-0.289561
	average	0.313763	-0.376221		average	0.284846	-0.457755
	SEM	0.020732	0.072506		SEM	0.054456	0.06757
