# Supplementary material for: Cholinergic modulation shifts the response of CA1 pyramidal cells to depolarizing ramps via TRPM4 channels with potential implications for place field firing
Source: eLife. 2023 Jul 5;12:e84387. doi: 10.7554/eLife.84387 (PMC10365838; doi:10.7554/eLife.84387)
Supplement: Figure 10—source data 1. [file elife-84387-fig10-data1.xlsx]

## Sheet: Fig10
	Panel A3	10 mM BAPTA			Panel B3	30 mM BAPTA, 100 nM [Ca2+]			Panel C3	30 mM BAPTA, 10 nM [Ca2+]
		control	CCh			control	CCh			control	CCh
		0.889286	-0.0920168			0.63371	0.227334			0.720077	0.796296
		0.828765	0.124604			0.697367	0.455266			0.461228	0.613805
		0.93321	-0.166667			0.555952	0.324405			0.892857	0.824968
		0.626014	0.0592949			0.751667	0.491111			0.637302	0.928571
		0.744331	0.18491			0.396623	0.0897413			0.898636	0.805528
		0.468731	-0.877253			0.488645	0.291972			0.74254	0.71645
		0.892625	-0.241811			0.554502	0.599614			0.732668	0.725556
		0.986014	-0.36784			0.868056	0.501414			0.734885	0.721251
		1	-0.230217							0.704064	0.579008
		0.829841	0.394136							0.857143	0.844444
										0.665844	0.905128
										0.681836	0.624747
	average	0.819882	-0.121286		average	0.618315	0.372607		average	0.727423	0.757146
	SEM	0.05	0.11		SEM	0.05	0.06		SEM	0.03	0.03
